# Supplementary material for: The ABLE Anterior-Based Muscle-Sparing Approach: A Safe and Effective Option for Total Hip Arthroplasty
Source: PubMed Central journal article supplement — Arthroplast Today. 2022 Jul 19;16:264–269.e1. doi: 10.1016/j.artd.2022.06.007 (PMC9458897; doi:10.1016/j.artd.2022.06.007), 2022-07-19
Supplement: mmc3.pdf [file mmc3.pdf]

# CONFLICT OF INTEREST STATEMENT

## *American Association of Hip and Knee Surgeons*

(Adopted from the American Academy of Orthopaedic Surgeons disclosure statement)

The following form **must be filled out completely and submitted by each author (example, 6 authors, 6 forms).**  
**All items require a response. If there is no relevant disclosure for a given item, enter "None."**

Manuscript Title

1. Royalties from a company or supplier (The following conflicts were disclosed)  
*INVOMED, INC*  
*SMITH & NEPHEW, INC*
2. Speakers bureau/paid presentations for a company or supplier (The following conflicts were disclosed)  
*SMITH & NEPHEW, INC*
- 3A. Paid employee for a company or supplier (The following conflicts were disclosed)  
*∅*
- 3B. Paid consultant for a company or supplier (The following conflicts were disclosed)  
*∅*
- 3C. Unpaid consultants for a company or supplier (The following conflicts were disclosed)  
*∅*
4. Stock or stock options in a company or supplier (The following conflicts were disclosed)  
*∅*
5. Research support from a company or supplier as a Principal Investigator (The following conflicts were disclosed)  
*INSTITUTIONAL, SMITH & NEPHEW, INC*
6. Other financial or material support from a company or supplier (The following conflicts were disclosed)  
*∅*
7. Royalties, financial or material support from publishers (The following conflicts were disclosed)  
*SPRINGER NATURE*
8. Medical/Orthopaedic publications editorial/governing board (The following conflicts were disclosed)  
*EMERITUS, ARTHROPLASTY TODAY.*
9. Board member/committee appointments for a society (The following conflicts were disclosed)  
*AAHKS, ARTHROPLASTY TODAY.*

**Each author must sign AND print or type his/her name, date and submit a separate form**

In addition, one BLINDED Conflict of Interest form (no author names used) should be submitted per manuscript with all author disclosures.

*BRIAN J. MCGREY*

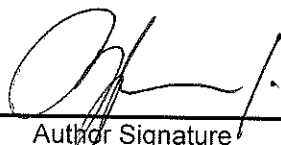

*3/11/2022*

Author Name (Print or Type)

Author Signature

Date
