# Supplementary material for: The ABLE Anterior-Based Muscle-Sparing Approach: A Safe and Effective Option for Total Hip Arthroplasty
Source: PubMed Central journal article supplement — Arthroplast Today. 2022 Jul 19;16:264–269.e1. doi: 10.1016/j.artd.2022.06.007 (PMC9458897; doi:10.1016/j.artd.2022.06.007), 2022-07-19
Supplement: mmc4.pdf [file mmc4.pdf]

# CONFLICT OF INTEREST STATEMENT

## *American Association of Hip and Knee Surgeons*

(Adopted from the American Academy of Orthopaedic Surgeons disclosure statement)

The following form **must be filled out completely and submitted by each author (example, 6 authors, 6 forms).**  
**All items require a response. If there is no relevant disclosure for a given item, enter "None."**

Manuscript Title

1. Royalties from a company or supplier (The following conflicts were disclosed)  
∅
2. Speakers bureau/paid presentations for a company or supplier (The following conflicts were disclosed)  
∅
- 3A. Paid employee for a company or supplier (The following conflicts were disclosed)  
∅
- 3B. Paid consultant for a company or supplier (The following conflicts were disclosed)  
Smith + Nephew
- 3C. Unpaid consultants for a company or supplier (The following conflicts were disclosed)  
∅
4. Stock or stock options in a company or supplier (The following conflicts were disclosed)  
∅
5. Research support from a company or supplier as a Principal Investigator (The following conflicts were disclosed)  
Smith + Nephew
6. Other financial or material support from a company or supplier (The following conflicts were disclosed)  
∅
7. Royalties, financial or material support from publishers (The following conflicts were disclosed)  
∅
8. Medical/Orthopaedic publications editorial/governing board (The following conflicts were disclosed)  
∅
9. Board member/committee appointments for a society (The following conflicts were disclosed)  
AAHKS - Chair Advocacy + Health Policy  
EDA - Chair Membership

**Each author must sign AND print or type his/her name, date and submit a separate form**

In addition, one BLINDED Conflict of Interest form (no author names used) should be submitted per manuscript with all author disclosures.

ADAM RAWA  
Author Name (Print or Type)

  
Author Signature

3/16/22  
Date
